# Supplementary material for: Delay in diagnosis and treatment of patients with oral cancer seeking treatment in a public tertiary hospital in India
Source: Research Square preprint supplement (doi:10.21203/rs.3.rs-6318005/v1), 2025-04-01
Supplement: Supplementary file 1 [file 9ee081f54bee3aca768532b1.docx]

**Supplementary Table 1: Socio-demographic factors associated with patient, diagnostic and treatment intervals**

| Variable | | Frequency (%) | Patient interval | | Diagnostic interval | | Treatment interval | |
| --- | --- | --- | --- | --- | --- | --- | --- | --- |
| Median (IQR) days | p value | Median (IQR) days | p value | Median (IQR) days | p value |
| Age | Below 60 years | 92 (79.3) | 14.0 (5.0-60.8) | 0.759 | 87.5 (39.8-251.5) | 0.531 | 56.5 (31.5-94.8) | 0.180 |
| 60 years and above | 24 (20.7) | 8.0 (5.0-34.8) | 89.5 (30.8-175.2) | 35.5 (26.0-96.5) |
| Gender | Male | 102 (87.9) | 14.0 (5.0-61.0) | 0.342 | 86.0 (39.0-179.8) | 0.067 | 55.5 (29.0-95.5) | 0.796 |
| Female | 14 (12.1) | 8.5 (3.8-34.2) | 198.0 (70.2-500.2) | 46.0 (28.8-77.2) |
| Religion | Hindu | 77 (66.4) | 15.0 (6.0-66.0) | 0.165 | 87.0 (37.0-250.0) | 0.759 | 60.0 (30.0-99.5) | 0.183 |
| Other | 39 (33.6) | 7.0 (4.0-44.0) | 95.0 (45.0-204.0) | 45.0 (27.0-81.0) |
| Category of caste | General | 78 (67.3) | 13.0 (4.8-58.5) | 0.791 | 88.0 (41.2-246.2) | 0.835 | 54.5 (28.0-92.8) | 0.462 |
| Others | 38 (32.7) | 14.0 (5.0-63.5) | 89.0 (38.0-178.5) | 61.0 (32.5-97.0) |
| Marital status | Married | 100 (86.2) | 13.5 (5.0-57.0) | 0.801 | 86.0 (39.0-175.5) | 0.357 | 54.5 (29.0-96.5) | 0.442 |
| Other | 16 (13.8) | 13.5 (4.2 - 95.8) | 150.0 (32.2-313.0) | 63.5 (37.8-88.5) |
| Education | Illiterate | 39 (33.6) | 12.0 (5.0-58.0) | 0.829 | 127.0 (33.0-253.0) | 0.188 | 45.0 (28.0-97.0) | 0.440 |
| Literate | 77 (66.4) | 14.0 (4.5-60.5) | 77.0 (40.5-180.0) | 59.0 (31.0-95.0) |
| Per capita family income | ≤ Rs 1134 | 49 (42.2) | 13.0 (4.0-56.0) | 0.547 | 88.0 (42.0-207.5) | 0.746 | 48.0 (28.5-86.5) | 0.459 |
| > Rs 1134 | 67 (57.8) | 14.0 (5.0-73.0) | 88.0 (35.0-246.0) | 60.0 (29.0-97.0) |
| Occupation | Employed | 12 (10.3) | 12.0 (6.0-27.0) | 0.706 | 81.0 (37.0-225.8) | 0.810 | 55.5 (22.8-120.8) | 0.870 |
| Unemployed | 104 (89.7) | 13.5 (5.0-61.0) | 88.0 (39.0-218.2) | 55.0 (29.0-94.8) |
| Socioeconomic status | Lower | 58 (50.0) | 13.5 (5.8-60.2) | 0.648 | 86.5 (37.5-191.2) | 0.787 | 55.5 (28.8-98.2) | 0.776 |
| Upper lower or lower middle | 58 (50.0) | 12.0 (4.0-55.8) | 92.5 (41.2-291.2) | 55.0 (29.0-92.8) |
| Type of family | Nuclear | 86 (74.1) | 13.0 (5.0-60.2) | 0.967 | 101.0 (46.8-273.2) | 0.013 | 56.0 (29.8-90.5) | 0.781 |
| Joint | 30 (25.9) | 14.5 (4.5-63.8) | 49.5 (23.0-118.5) | 41.5 (26.8-108.5) |
| Place of residence | Delhi | 63 (54.3) | 13.0 (5.0-61.0) | 0.947 | 94.0 (45.0-289.0) | 0.449 | 56.0 (30.0-94.0) | 0.794 |
| Outside Delhi | 53 (45.7) | 14.0 (5.0-54.5) | 86.0 (34.0-175.0) | 55.0 (28.0-99.5) |

**Supplementary Table 2: Association between the health system and healthcare worker-related factors and diagnostic interval.**

| Variable | | Frequency (%) | Patient interval | | Diagnostic interval | | Treatment interval | |
| --- | --- | --- | --- | --- | --- | --- | --- | --- |
| Median (IQR) days | p value | Median (IQR) days | p value | Median (IQR) days | p value |
| Time taken from residence by the patient to reach the treatment hospital | Within 1 hour | 49 (42.2) | 13.0 (4.5-86.0) | 0.827 | 107.0 (34.0-312.0) | 0.408 | 60.0 (28.0-98.5) | 0.698 |
| More than 1 hour | 67 (57.8) | 14.0 (5.0-46.0) | 86.0 (39.0-176.0) | 48.0 (29.0-95.0) |
| Preferred mode of transport to reach the healthcare center | Public transport | 79 (68.1) | 15.0 (5.0-61.0) | 0.486 | 106.0 (43.5-297.0) | 0.273 | 57.0 (33.0-102.0) | 0.051 |
| Private or rented transport | 37 (31.9) | 8.0 (4.5-46.5) | 80.0 (39.0-176.0) | 38.0 (23.5-86.0) |
| Cancer was first suspected in contact with | First or second healthcare provider | 76 (65.5) | 14.5 (5.2-88.0) | 0.078 | 76.5 (28.2-196.5) | 0.072 | 59.5 (34.5-104.5) | 0.020 |
| Later | 40 (34.5) | 8.0 (3.0-40.8) | 107.0 (55.2-251.5) | 38.0 (26.0-66.2) |
| Specialization of the first doctor seen | Informal medical provider | 27 (23.3) | 7.0 (4.0-41.0) | 0.324 | 94.0 (44.0-164.5) | 0.893 | 47.0 (29.5-104.5) | 0.836 |
| Trained modern medicine practitioner | 89 (76.7) | 14.0 (5.0-61.0) | 86.0 (35.0-265.0) | 56.0 (28.0-95.0) |
| Advice given by first healthcare provider seen | Gave symptomatic treatment and did not refer | 64 (55.2) | 9.0 (4.0-42.5) | 0.098 | 119.5 (76.0-262.0) | <0.001 | 46.0 (27.0-79.5) | 0.159 |
| Gave symptomatic treatment and was referred to a higher center | 52 (44.8) | 17.5 (5.0-88.0) | 47.5 (21.0-103.5) | 59.5 (36.2-100.8) |

**Supplementary Table 3: Association of grade and stage of cancer with patient, diagnostic and treatment intervals**

| **Variable** | | **Frequency (%)** | **Patient interval** | | **Diagnostic interval** | | **Treatment interval** | |
| --- | --- | --- | --- | --- | --- | --- | --- | --- |
| **Median (IQR) days** | **p value** | **Median (IQR) days** | **p value** | **Median (IQR) days** | **p value** |
| Grade | Grade 1 | 42 (36.2) | 13.5 (4.0-55.8) | 0.886 | 98.0 (29.8-271.0) | 0.796 | 51.0 (28.0-82.5) | 0.237 |
| Grade 2 or 3 | 74 (63.8) | 13.5 (5.0-61.0) | 83.0 (41.2-194.2) | 57.5 (32.5-102.2) |
| Stage | Stage I or II | 12 (10.4) | 16.0 (3.8-34.0) | 0.666 | 102.0 (45.5-379.5) | 0.508 | 45.0 (26.8- 64.0) | 0.389 |
| Stage III or IV | 104 (89.6) | 13.0 (5.0-68.5) | 88.0 (39.0-201.0) | 56.0 (29.2-96.5) |  |

**Mann-Whitney U test was used for df=1 and Kruskal Wallis test was used for df>1*

**Supplementary Table 4: Characteristics of patients who underwent in-depth interviews**

| **Participant code** | **Age** | **Gender** | **Educational status** | **Religion** | **Site of disease** | **Grade** | **Stage of disease** | **Patient interval (days)** | **Diagnostic interval (days)** | **Treatment interval (days)** | **Total interval (days)** |
| --- | --- | --- | --- | --- | --- | --- | --- | --- | --- | --- | --- |
| P1 | 52 | Male | High school | Hindu | Buccal mucosa | Moderately differentiated | Stage IV | 15 | 48 | 68 | 131 |
| P2 | 65 | Male | Graduate | Hindu | Oropharynx | Poorly differentiated | Stage IV | 3 | 545 | 46 | 594 |
| P3 | 60 | Male | Illiterate | Muslim | Oropharynx | Moderately differentiated | Stage IV | 92 | 225 | 64 | 381 |
| P4 | 54 | Female | Illiterate | Hindu | Tongue | Moderately differentiated | Stage IV | 396 | 212 | 59 | 667 |
| P5 | 41 | Male | High school | Muslim | Base of tongue | Moderately differentiated | Stage IV | 3 | 304 | 97 | 404 |
| P6 | 50 | Female | High school | Hindu | Buccal mucosa | Well  differentiated | Stage IV | 70 | 80 | 16 | 116 |
| P7 | 63 | Female | Middle school | Hindu | Oropharynx | Poorly differentiated | Stage IV | 61 | 118 | 31 | 210 |
| P8 | 53 | Male | High school | Hindu | Soft palate | Moderately differentiated | Stage III | 21 | 138 | 17 | 176 |
| P9 | 65 | Male | Illiterate | Hindu | Buccal mucosa | Well  differentiated | Stage II | 31 | 176 | 26 | 233 |
| P10 | 35 | Male | Illiterate | Hindu | Buccal mucosa | Well  differentiated | Stage IV | 105 | 21 | 31 | 157 |
| P11 | 40 | Male | High school | Hindu | Buccal mucosa | Well  differentiated | Stage IV | 3 | 687 | 65 | 755 |
